# Supplementary material
Source: publisher figshare collection journal article supplement (https://diabetesjournals.figshare.com/articles/dataset/_/16826689)

1 **Figure legends- Online Supplementary**

2 **Figures (S1A, S1B, S1C)**

3 Violin plots demonstrating the distribution of expression quantitative trait loci (*eQTL*) associations for the SIRPG (1A), IL27.EB13 (1B), and  
4 CTRB1 (1C) proteins in various tissues. These plots were created using the GTEx Portal online tool for gene expression (Data Source: GTEx  
5 Analysis Release V8 (dbGaP Accession phs000424.v8.p2)).

6

7 **Figures (S2A, S2B, S2C)**

8 Violin plots demonstrating the distribution of expression quantitative trait loci (*eQTL*) associations for the SIRPG rs2281808 genotype (2SA),  
9 IL27.EB13 rs181209 genotype (2SB), and CTRB1 rs8051363 genotype (2SC) proteins in various tissues. These plots were created using the  
10 GTEx Portal online tool for gene expression (Data Source: GTEx Analysis Release V8 (dbGaP Accession phs000424.v8.p2)).

11

Figure S1A

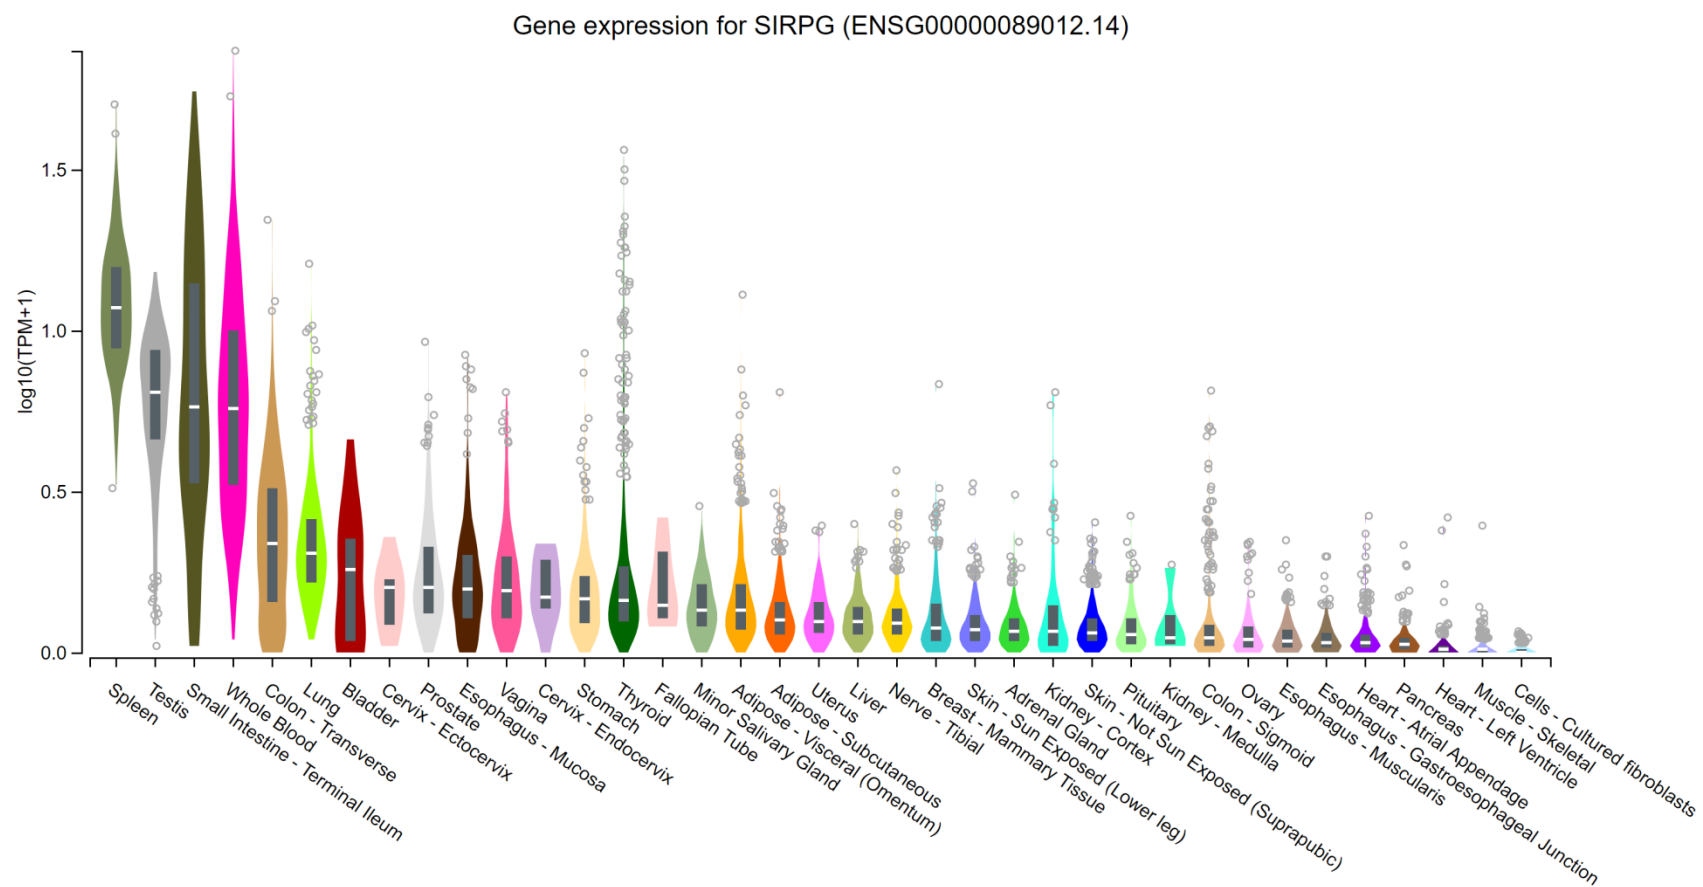

**Figure S1B**

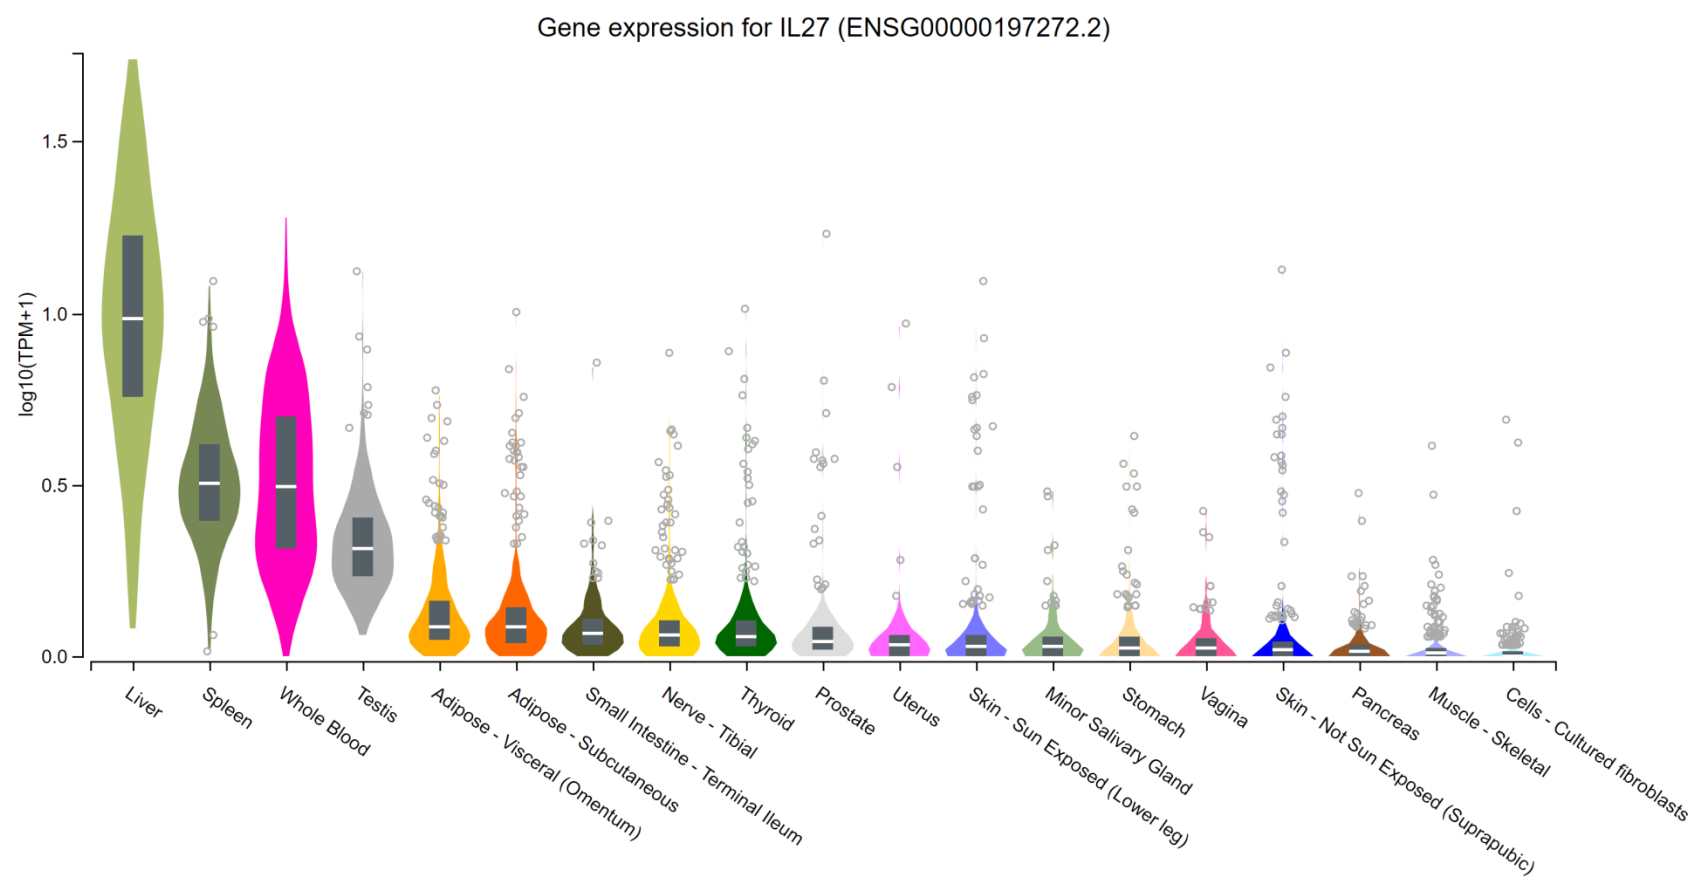

Figure S1C

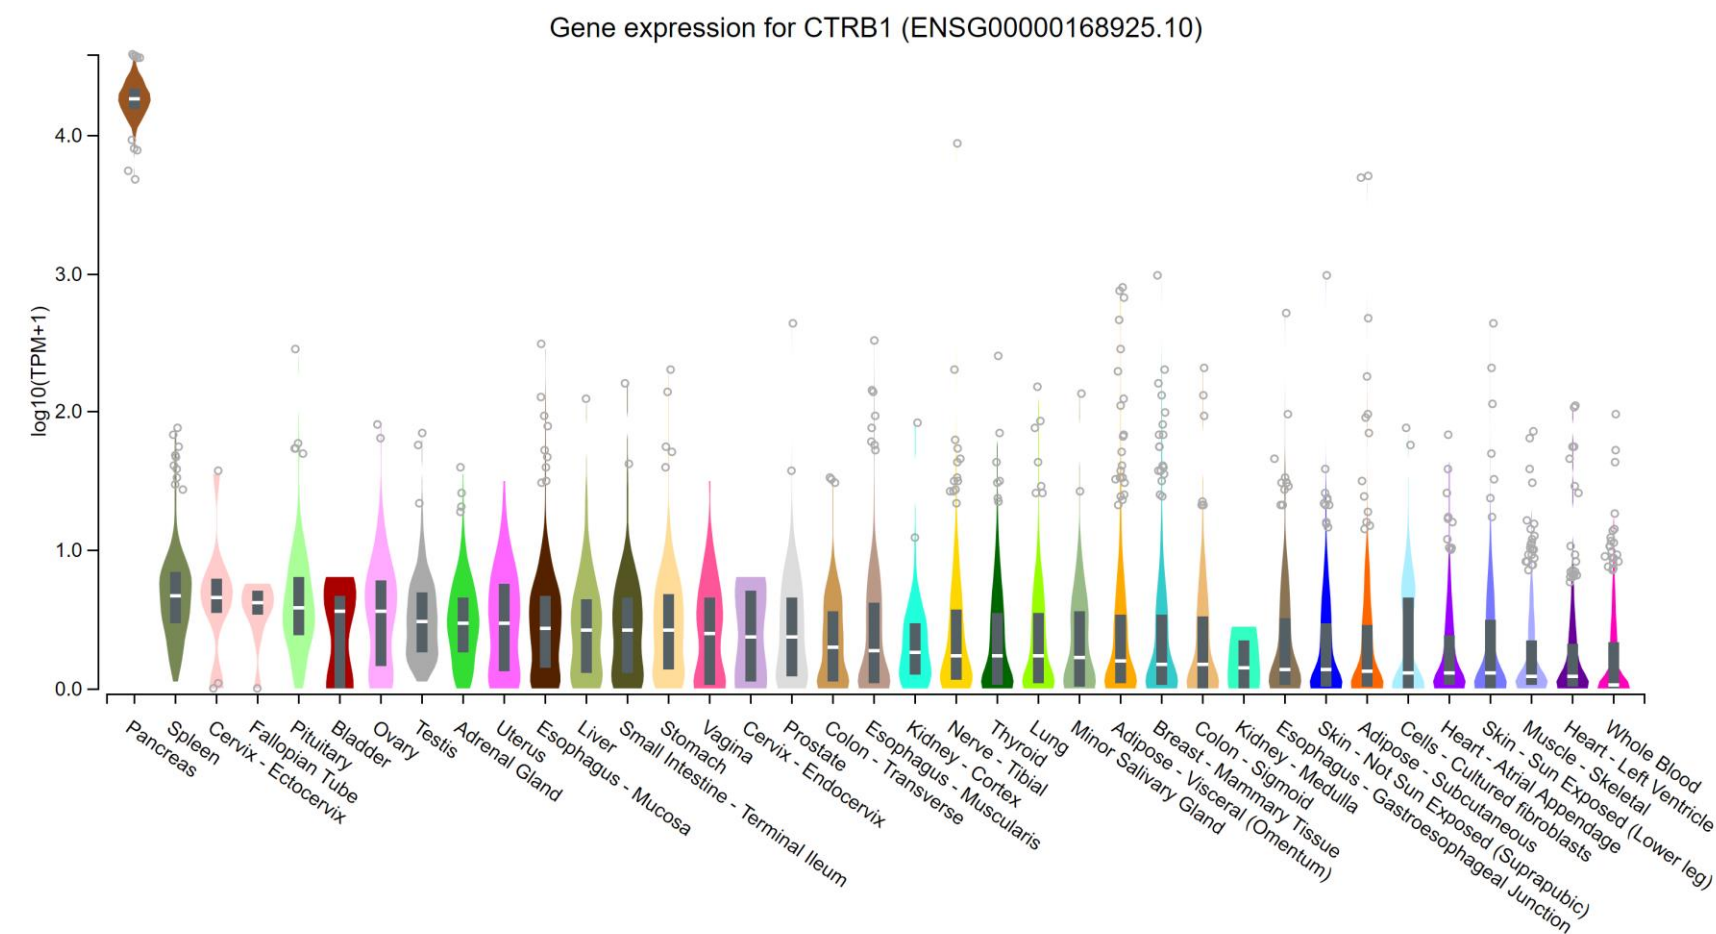

**Figure S2A.**

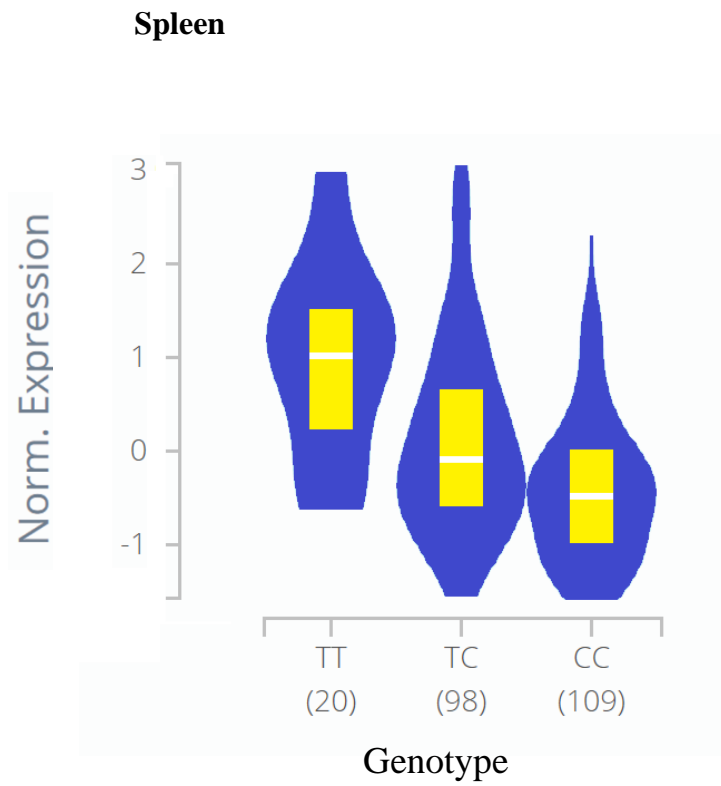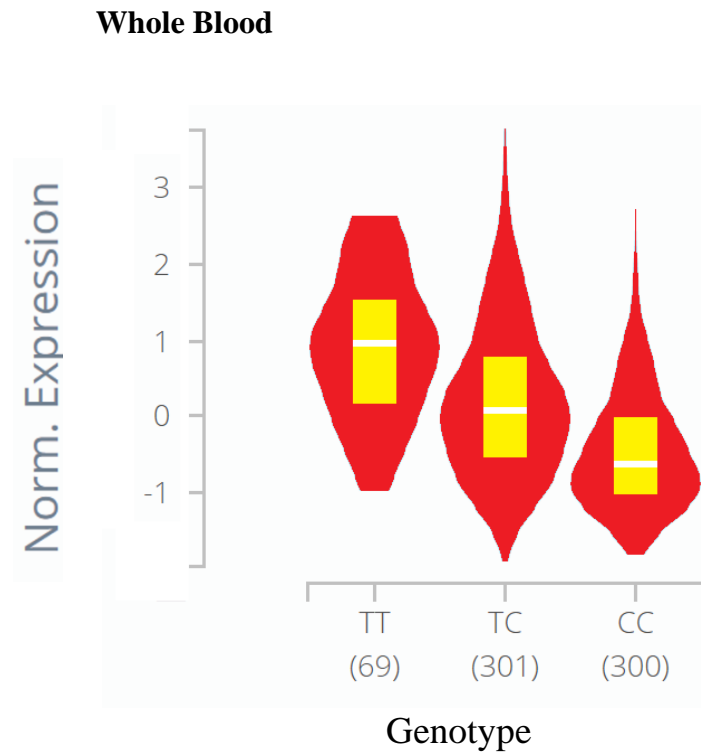

**Figure S2B.**

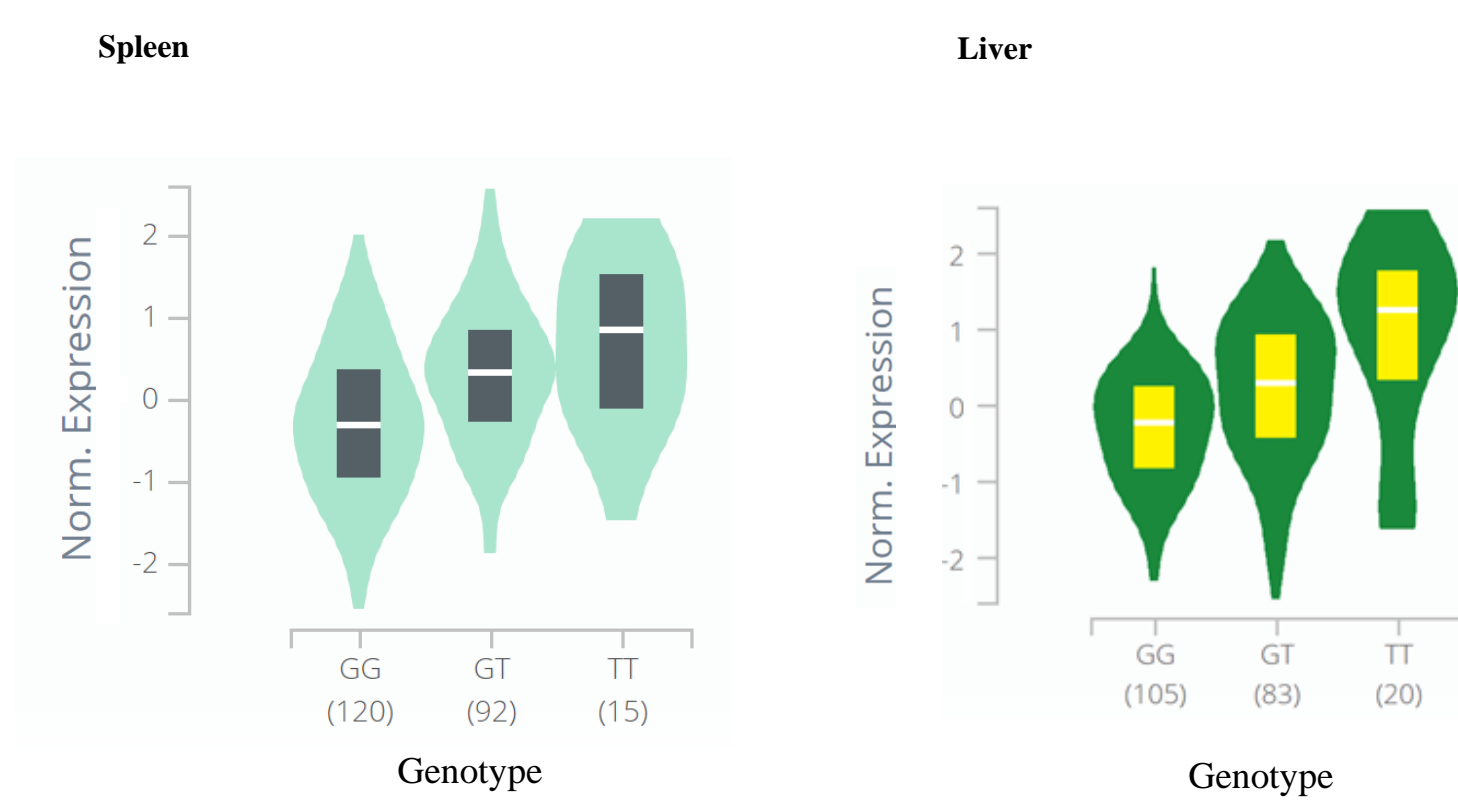

**Figure S2C.**

**Spleen**

**Liver**

**Pancreas**

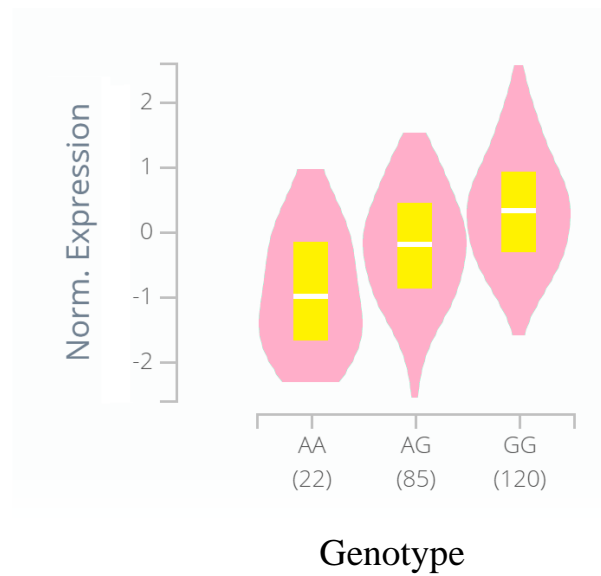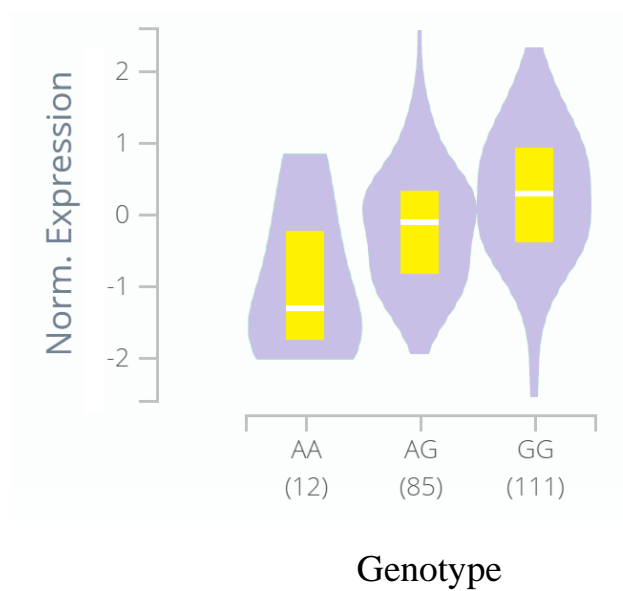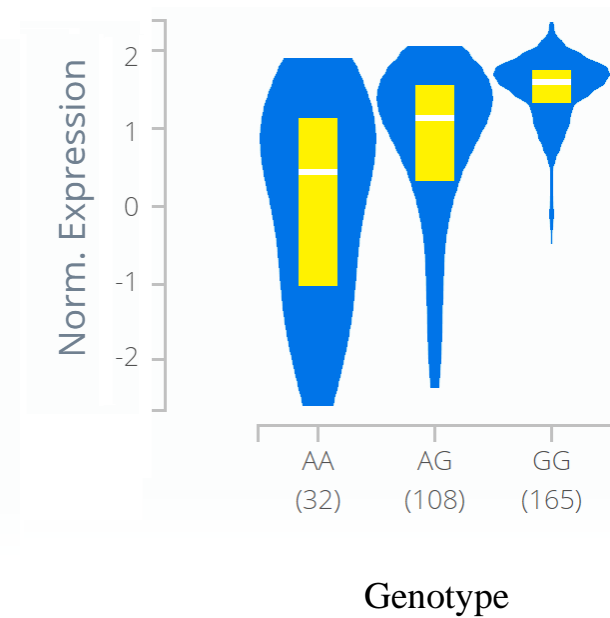

Supplement: Supplementary file 1 [file 1]
